# Supplementary material for: T follicular helper 17 (Tfh17) cells are superior for immunological memory maintenance
Source: eLife. 2023 Jan 19;12:e82217. doi: 10.7554/eLife.82217 (PMC9891720; doi:10.7554/eLife.82217)
Supplement: Figure 1—figure supplement 1—source data 1. [file elife-82217-fig1-figsupp1-data1.xlsx]

## Sheet: Figure 1-figure supplement 1
B
	iTfh1	iTfh17	iTfh2	Non-Tfh	GC-Tfh
	402	309	353	134	508
	388	495	356	123	547
	389	511	339	138	646
	274	306	282	108	545
	325	350	295
	462	367	273.6
	458	233.4	275.7
	337	280.1	370
	300	198.29	373
	283.7	241.3	269.3
	314		303
			394
			376
