# Supplementary material for: T follicular helper 17 (Tfh17) cells are superior for immunological memory maintenance
Source: eLife. 2023 Jan 19;12:e82217. doi: 10.7554/eLife.82217 (PMC9891720; doi:10.7554/eLife.82217)
Supplement: Figure 1—source data 1. [file elife-82217-fig1-data1.xlsx]

## Sheet: Figure1
D
	iTh0	iTh1	iTh17	iTh2	iTfh1	iTfh17	iTfh2		iTh0	iTh1	iTh17	iTh2	iTfh1	iTfh17	iTfh2		iTh0	iTh1	iTh17	iTh2	iTfh1	iTfh17	iTfh2
	7.68	7.83	9.18	10.2	85.6	47.3	69.4		736	627	933	665	1204	1188	1013		225	210	225	213	402	309	353
	8.15	11.4	32.5	30.1	82.1	32	69.2		711	618	943	675	1234	1223	898		239	204	245	240	388	495	356
	9	25	6.08	5.87	86	27.8	71.8		672	589	884	583	1055	1152	1037		226	237	215	212	389	511	339
	11.7	32.8	18.2	5.47	67.1	40.1	55.3		436	475	407	407	1038	1210	1058		224	262	310	199	274	306	282
	3.94	16.9	3.58	5.28	65.6	69.4	62.2		452	387	459	451	1071	1165	1130		246	239	301	194	325	350	295
	2.83	13.9	4.33	3.74	58	58	62.2		437	445	486	481	1062	1271	1145		199.23	250.9	231.4	225.2	462	367	273.6
					67.8	55.8	66.5						1053	1187	1062						458	233.4	275.7
					60.5	59.4	57.8						1047	1104	1063						337	280.1	370
					63.5	57.3	63.2						936	894	1051						300	198.29	373
					52.4	65.3	67.8						896	892	1110						283.7	241.3	269.3
					52.3		65.9						973		890						314		303
							40								881								394
							42.6								877								376
F
		iTfh1									iTfh17									iTfh2
	T-bet	2667	3039		3266	3259	2471	2464	2475		847	839		634	668	982	1109	1061		787	690		624	646	1198	1222	1191
	RORγt	3217	2969		2340	2406	2607	2552	2534		3183	3248		4521	4620	3817	3846	3849		2431	2444		2823	2805	2720	2702	2697
	GATA3	2308	2307		2236	2271	1991	1967	1961		2284	2253		2209	2217	1968	1968	1965		2451	2325		2874	2851	2750	2809	2699
H
	iTfh1	iTfh17	iTfh2		iTfh1	iTfh17	iTfh2
	15	6.77	14.2		0.7	61.2	8.98
	11	7.91	11.9		0.96	59.7	9.19
	25.9	4.51	10.1		3.22	52.9	24.2
	21.7	5.09	9.39		3.15	50.6	21.9
	20.9	5.15	10.2		3.12	52.7	29.7
	6.97	9.4	9.85		16.4	53.8	21.8
	6.52	10.4	9.79		13.3	56.8	19.7
	19.6	13.5	12		4.43	37.8	23.9
	14.2	14.5	12.7		3.82	38.6	24.2
	24.6	9.42	17.7		5.65	17.2	40.7
K
	iTh0	iTfh1	iTfh17	iTfh2		iTfh1	iTfh17	iTfh2		iTfh1	iTfh17	iTfh2
	3.76	8.53	15.9	14.8		57.9	3.69	3.21		17.95	30.45	16.79
	7.83	16.7	24.4	14.4		52.23	6.35	5.2		17.06	25.88	17.95
		9.47	16.5	21.4		52.14	4.44	20.7		16.24	33.31	7.76
		12.4	15.7	28.7		59.63	7.14	20.34		11.48	21.18	9.25
		26.7	22.1	22.5		40.02	20.53	26.35		16.05	15.03	7.25
		32.7	20.1			32.82	19.25			12.38	20.05
		24.4	26.3			67.64	18.81			8.46	27.71
		23.1	30.2			39.22	21.43			12.82	44.23
