# Supplementary material for: T follicular helper 17 (Tfh17) cells are superior for immunological memory maintenance
Source: eLife. 2023 Jan 19;12:e82217. doi: 10.7554/eLife.82217 (PMC9891720; doi:10.7554/eLife.82217)
Supplement: Figure 2—source data 1. [file elife-82217-fig2-data1.xlsx]

## Sheet: Figure2
E
	iTfh1	iTfh17	iTfh2	iTfh1	iTfh17	iTfh2
	0.52	1.92	0.78	0.38	0.75	0.79
	1.2	2.22	0.96	0.61	1.77	0.49
	0.57	1.56	0.91	0.56	1.56	0.091
	1.45	1.37	3	0.23	0.79	0.32
	0.86	1.03	2.27	0.2	0.99	0.64
	1.17	0.89		0.44	0.87	0.42
	1.24	1.52		0.27	0.67
	1.32	1.3		0.49
				0.29
F
	iTfh1	iTfh17	iTfh2	iTfh1	iTfh17	iTfh2
	2.37	3.37	5.18	1.51	2.25	1.87
	1.94	3.38	4.04	1.2	3.19	1.51
	1.81	3.02	3.89	1.36	3.05	0.63
	2.04	2.71	4.26	0.66	3.23	2.31
	2.03	2.07	3.09	0.5	1.59	1.91
	2.74	2.74		2.5	2.78	1.35
	2.93	2.46		1.56	2.34
	3.14	1.92		2.39
				1.49
G
	iTfh1	iTfh17	iTfh2	iTfh1	iTfh17	iTfh2
	0.82	1.46	1.56	1.09	1.71	0.89
	1.04	1.4	1.06	1.01	2.25	0.4
	0.72	1.05	2.36	0.8	0.79	0.18
	0.8	1.28	7.18	0.8	1.21	1.96
	0.75	2.99	7.1	0.43	0.64	1.24
	1.53	1.57		1.27	1.14	0.78
	1.01	1.26		0.52	1.15
	2.58	1.13		0.51
				0.4
H
	iTfh1	iTfh17	iTfh2		iTfh1	iTfh17	iTfh2			iTfh1	iTfh17	iTfh2		iTfh1	iTfh17	iTfh2
	0.9005	0.8376	1.2112		0.8545	1.071	0.3437			1.001	0.9286	1.2784		0.327	0.5751	0.1582
	0.725	1.2263	1.2174		0.9629	1.1322	1.0287			0.7731	1.1344	1.3756		0.3678	0.6837	0.4146
	1.1634	1.148	0.8082		0.7987	1.1525	0.7353			1.2411	1.1154	1.1161		0.3416	0.6869	0.3857
	1.0237	1.3732	0.4647		1.0785	1.0409	0.7479			0.9457	1.2264	0.7438		0.4228	0.5098	0.397
	1.1514	1.4008	1.0002		0.5879	1.1684	0.7726			1.1555	1.4384	0.8421		0.2451	0.4986	0.6073
	1.9481	1.3377	0.7615		0.3358	0.9305	0.6143			1.0069	0.9467	0.8973		0.2452	0.51	0.4069
	1.2795	1.3921	0.8361		0.3575	0.8741	0.5891			0.8449	0.9525	0.9642		0.3689	0.5126	0.311
	1.391	1.8635	0.9766		0.7052	0.4363	0.6047			0.9153	0.9149	1.0317		0.5515	0.3592	0.668
	0.9737	0.5515			0.6059	0.5394	0.3861			0.8903	0.853			0.5213	0.2911	0.2432
	0.6663					1.0659	0.4122			0.899					0.8591	0.2178
						1.2836									1.0404
I
	Tfh1	Tfh17	Tfh2
	396	454	333
	372	431	367
	364	577	370
	457	538	371
	579	518	443
	420	504	430
	383	456	413
	401	433	386.5
	413	415	391.7
	410	441	410
	390.3	487	381.8
J
	Tfh1	Tfh17	Tfh2
	3407	3353	2587
	3363	3583	2948
	2977	3206	2603
	3017	3461	2384
	3098	3568	3098
	3313	3244	2795
	3316	3540	2912
	3122	3076	2854
