# Supplementary material for: T follicular helper 17 (Tfh17) cells are superior for immunological memory maintenance
Source: eLife. 2023 Jan 19;12:e82217. doi: 10.7554/eLife.82217 (PMC9891720; doi:10.7554/eLife.82217)
Supplement: Figure 3—source data 1. [file elife-82217-fig3-data1.xlsx]

## Sheet: Figure3
D
		uv_response_up	unfolded_protein_response	protein_secretion	kras_signaling_dn	il6_jak_stat3_signaling	glycolysis	fatty_acid_metabolism	epithelial_mesenchymal_transition	dna_repair	coagulation	cholesterol_homeostasis	adipogenesis	reactive_oxygen_species_pathway	peroxisome	myc_targets_v1	mitotic_spindle	heme_metabolism	e2f_targets	apical_surface	apical_junction	androgen_response	wnt_beta_catenin_signaling	tnfa_signaling_via_nfkb	pi3k_akt_mtor_signaling	p53_pathway	oxidative_phosphorylation	mtorc1_signaling	interferon_gamma_response	inflammatory_response	il2_stat5_signaling	hypoxia	g2m_checkpoint	estrogen_response_late	estrogen_response_early	complement	apoptosis	allograft_rejection
	CCR7loPD-1+cTfh vs CCR7hiPD-1-cTfh	0.972364	1.34792	1.30907	-1.3153	1.58474	1.1289	1.19302	1.35223	0.795118	-0.49747	1.3359	1.36405	1.78904	1.6738	1.59962	2.73527	2.14581	2.82706	-1.66903	-1.58977	1.74278	-1.794	2.52818	1.93133	2.16917	1.90469	2.90937	2.79319	2.23703	2.30072	1.74831	3.58857	1.71232	1.55802	1.70803	2.22576	2.82912
	EM CD4 vs CM CD4	1.62194	1.95502	1.8003	-1.8448	1.83656	1.80361	1.5787	2.30064	1.64308	1.74748	1.63695	1.61561	1.24752	1.16477	1.44754	1.32065	1.18634	1.3599	-1.35006	-1.33944	1.25129	-1.60085	2.50731	2.26069	2.15515	2.15364	2.57084	2.34781	2.20906	2.46813	2.10713	1.66372	2.13236	1.51913	2.25848	2.16696	2.54092
G
	TCM	TEM		TfhCM	TfhEM
	63.9	40.5		78.3	49.9
	64.2	39.6		76.4	53
	66.5	39.3		77.5	55.7
	65.8	45.5		61.8	46.2
	67.9	46.2		61.8	46.7
	66	45		63.3	45.7
	35.5	27.7		46.7	25.4
	43	24.5		35.5	35.3
	40.4	25.1		37.1	28.7
	47.5	31.8		42.6	26.2
	48.8	33.1		37.8	28
	45.5	29.2		39	27.2
	57.2	46.2		54.6	48.9
	51.5	46		63.9	51.3
	55.7	45.5		56.5	48.7
I
	TCM	TEM		TfhCM	TfhEM
	2.43489	1.53679		2.85177	0.991029
	2.25206	1.29421		2.92686	0.920629
	2.29369	1.46931		2.93218	0.989598
	0.702048	0.223533		1.01375	1.35462
	0.530432	0.223803		0.980846	1.21368
	0.887572	0.250736		0.969312	1.00394
	0.739837	0.542606		0.526449	0.449564
	0.710917	0.520979		0.465321	0.380298
	0.779374	0.539839		0.553204	0.51203
	1.32069	0.950715		1.60093	1.05565
	1.31474	0.926916		1.59514	1.03182
	1.30151	0.935759		1.60076	1.01721
	1.00483	1.09182		1.59733	1.10259
	1.1724	1.2326		1.66618	1.30965
	1.21788	1.2159		1.73117	1.24019
