# Supplementary material for: T follicular helper 17 (Tfh17) cells are superior for immunological memory maintenance
Source: eLife. 2023 Jan 19;12:e82217. doi: 10.7554/eLife.82217 (PMC9891720; doi:10.7554/eLife.82217)
Supplement: Figure 4—source data 1. [file elife-82217-fig4-data1.xlsx]

## Sheet: Figure4
A
	Tfh1CM	Tfh17CM	Tfh2CM
	7.2	58.3	9.91
	9.68	57.2	16.3
	9.64	57.7	16.9
	13.4	52	14.9
	9.09	59.5	13.5
	7.11	62.9	14.6
	17.1	44.7	17
	17.4	42	21.8
	7.96	61.3	14.7
	12.9	45.2	19.7
	27.6	29.5	27.2
	14.8	44.5	21.8
	13.6	46	16.5
	14.5	50	14.9
	7.97	59.5	12.3
	11.4	52.6	20.5
	8.97	63.4	10.3
	13.6	47.9	23.1
	11	55.2	17.7
	8.27	64.2	11.7
	6.74	62.3	7.93
	9.17	57	16.4
	6.46	64.7	5.67
	9.82	55.8	22.9
	14.3	50.3	19.3
	19.3	43.7	11.9
	15.7	50.2	18.4
	15.6	46.8	17.6
	17.1	44.7	19.1
	19.7	39.5	22.9
	5.67	62.8	12
	17	48.5	20.3
	9.07	59.6	15.5
	12.4	52.7	16.5
	4.85	8.5	4.79
B
	Tfh1EM	Tfh17EM	Tfh2EM
	27.9	17.7	6.28
	39.8	19.6	14
	33.8	24.8	11.8
	36.6	19.1	8.91
	26.2	33.3	11.3
	24.5	27.5	13.2
	48.7	12.2	8.01
	38.1	16.2	13.9
	32.7	28.6	12.4
	34.3	15.3	9.19
	55.5	11.3	15.2
	43.7	15.7	17
	31.9	20.4	9.57
	38.3	17.3	6.16
	20.4	31.3	9.31
	29	24.4	13.9
	27	28.2	8.06
	36.5	18.1	22
	39.2	25.8	10.2
	27	35.9	11.2
	23.7	30.1	9.5
	29.2	23.7	8.72
	22.9	30.5	4.52
	39.4	20.5	12.6
	39.8	20.2	10.9
	44.2	15.4	7.05
	34	24.6	9.41
	37.7	20.1	13
	29	17.7	9.71
	36	20.4	14.8
	23.9	26.4	10.2
	38	19.6	10.9
	35	20.5	7.92
C
	Tfh1	Tfh17	Tfh2
	0.343109	3.90556	2.16608
	0.426584	4.71069	2.70428
	0.993534	5.67391	4.99371
	0.407975	2.74167	2.10997
	0.747554	4.63354	3.40758
	0.396171	2.95154	2.3963
	0.430124	3.78836	3.01724
	0.853061	3.85561	3.0655
	0.409861	2.86266	2.04636
	1.02685	6.13954	5.65
	0.829569	3.57576	2.88889
	0.561525	3.79894	2.19231
	0.383107	1.70859	1.60345
	0.59612	3.59162	3.78534
	0.984914	3.60513	3.33645
	1.00449	4.31548	3.83158
	1.10791	6.20635	4.43529
	1.68452	9.54955	4.91139
	0.227451	1.5812	1.41755
	0.908316	4.08621	3
	0.692737	3.8913	2.08163
	0.62387	3.75132	3.91534
	0.299572	2.12027	1.56497
	0.754826	6.47154	5.86956
	0.666667	3.91351	3.20548
	0.706107	3.97765	3.4686
	1.39062	4.86624	5.24161
	0.648452	2.92105	2.17133
	1.18182	4.22159	3.9418
	1.07604	3.47525	3.32547
	0.520067	4.03333	2.80247
	0.799603	3.3066	3.44498
	0.984914	7.63889	7.44248
D
		Control					Treated
	T-bet	0.941176	1.02941	0.676471	1.32353	1.02941	0.3125	0.342857	0.391304	0.311111	0.228571
	RORγt	0.942029	1.15942	1.08696	0.942029	0.869565	0.846154	0.8125	0.8	0.769231	0.583333
	GATA3	0.882353	0.966387	1.30252	1.05042	0.798319	0.619048	0.521739	0.322581	0.36	0.368421
E
	T-bet	RORγt	GATA3
	0.3125	0.846154	0.619048
	0.342857	0.8125	0.521739
	0.391304	0.8	0.322581
	0.311111	0.769231	0.36
	0.228571	0.583333	0.368421
F
		Control																									Treated
	IFN-γ	8.32	17.6	22.5	18.2	14.9	34.2	16.3	28.7	16.8	14.7	32.9	18.6	11.4													0.87	3.82	6.97	3.1	2.48	3.51	3.02	3.5	3.7	1.64	4.34	3.1	1.22
	IL-17A	1.78	0.58	0.83	1.28	0.5	0.65	1.11	1.01	0.36	1.12	0.61	0.91	0.28													1.16	0.7	0.48	0.74	0.35	0.44	0.31	0.4	0.21	0.36	0.61	0.36	0.16
	IL-4	2.18	0.23	0.25	0.43	0.43	0.25	0.25	0.38	0.36	0.07	0.12	0.25	0.59													0.65	0.11	0.14	0.074	0.061	0.03	0.051	0.2	0.053	0.056	0.057	0.08	0.2
G
	IFN-γ	IL-17A	IL-4
	0.1	0.65	0.3
	0.22	1.21	0.48
	0.31	0.58	0.56
	0.17	0.58	0.17
	0.17	0.7	0.14
	0.1	0.68	0.12
	0.19	0.28	0.2
	0.12	0.4	0.53
	0.22	0.58	0.15
	0.11	0.32	0.8
	0.13	1	0.48
	0.17	0.4	0.32
	0.11	0.57	0.34
