# Supplementary material for: T follicular helper 17 (Tfh17) cells are superior for immunological memory maintenance
Source: eLife. 2023 Jan 19;12:e82217. doi: 10.7554/eLife.82217 (PMC9891720; doi:10.7554/eLife.82217)
Supplement: Figure 5—figure supplement 1—source data 1. [file elife-82217-fig5-figsupp1-data1.xlsx]

## Sheet: Figure5-figure supplement 1
A
		0 h										18 h
	Tfh1	53.2	52.3	53.1	53.1	52.4						56.5	56.8	56.2	55.6	56.3
	Tfh17	53.2	52.3	53.1	53.1	52.4						56.6	56.5	55.8	55.1	56.2
	Tfh2	52.5	51.8	52.4	51.9	51.8						56.2	55.58	56.3	56.3	56.7
C
		0 h										18 h
	Tfh1	99.1	99.3	99.2	99.5	98.7						98.8	99	99.3	99.2	99.1
	Tfh17	96.8	96.4	97.2	96.5	97.1						97.4	96.3	95.5	97.5	96.2
	Tfh2	99.5	99.3	99.2	99.4	99.1						99.3	99.1	98.5	98.8	99.3
