# Supplementary material for: T follicular helper 17 (Tfh17) cells are superior for immunological memory maintenance
Source: eLife. 2023 Jan 19;12:e82217. doi: 10.7554/eLife.82217 (PMC9891720; doi:10.7554/eLife.82217)
Supplement: Figure 5—figure supplement 2—source data 1. [file elife-82217-fig5-figsupp2-data1.xlsx]

## Sheet: Figure 5-figure supplement 2
A
	Day-7	Day7	Day28		Day-7	Day7	Day28		Day-7	Day7	Day28		Day-7	Day7	Day28		Day-7	Day7	Day28
	0.1856	3.1648	3.4168		0.0969	0.1335	2.6987		0.3044	0.2665	1.9951		0.1027	0.0923	0.6165		0.1856	3.1648	3.4168
	0.8119	1.684	3.4078		0.1571	1.2414	3.3667		0.2134	0.1784	2.0924		0.1351	0.1559	0.8588		0.8119	1.684	3.4078
	0.038	2.8712	3.2377		0.0754	0.2559	3.1251		0.2305	0.264	2.5637		0.118	0.1114	0.1235		0.038	2.8712	3.2377
	0.2442	1.8458	3.3557		0.176	0.5191	2.8155		0.1055	0.1412	0.983		0.1953	0.2406	0.3108		0.2442	1.8458	3.3557
	0.2666	2.9273	3.4532		0.1463	0.1698	2.3277		0.1744	0.2656	1.5772		0.1759	0.2114	0.6357		0.2666	2.9273	3.4532
	0.1218	1.4845	3.152		0.2947	1.0185	3.2577		0.1564	0.29	1.297		0.3253	0.5797	2.0721		0.1218	1.4845	3.152
	0.2655	2.9914	3.4352		0.3692	0.6883	2.6508										0.2655	2.9914	3.4352
	0.2037	1.7903	3.2752		0.1338	0.5247	3.1951										0.2037	1.7903	3.2752
	0.7553	2.3018	3.2647		0.1593	0.1978	2.7427										0.7553	2.3018	3.2647
	0.2175	3.3152	3.3136		0.1868	0.2409	2.0006										0.2175	3.3152	3.3136
	0.4536	1.6468	3.2636		0.5361	0.855	3.2016										0.4536	1.6468	3.2636
					0.2449	0.3425	3.1141										0.0969	0.1335	2.6987
					0.1622	0.4032	2.6919										0.1571	1.2414	3.3667
					0.2467	0.3393	2.7997										0.0754	0.2559	3.1251
					0.2367	0.2835	2.6076										0.176	0.5191	2.8155
																	0.1463	0.1698	2.3277
																	0.2947	1.0185	3.2577
																	0.3692	0.6883	2.6508
																	0.1338	0.5247	3.1951
																	0.1593	0.1978	2.7427
																	0.1868	0.2409	2.0006
																	0.5361	0.855	3.2016
																	0.2449	0.3425	3.1141
																	0.1622	0.4032	2.6919
																	0.2467	0.3393	2.7997
																	0.2367	0.2835	2.6076
																	0.1027	0.0923	0.6165
																	0.1351	0.1559	0.8588
																	0.118	0.1114	0.1235
																	0.1953	0.2406	0.3108
																	0.1759	0.2114	0.6357
																	0.3253	0.5797	2.0721
																	0.3044	0.2665	1.9951
																	0.2134	0.1784	2.0924
																	0.2305	0.264	2.5637
																	0.1055	0.1412	0.983
																	0.1744	0.2656	1.5772
																	0.1564	0.29	1.297
C
	Day-7	Day7	Day28		Day-7	Day7	Day28
	3.08903	25.5107	34.3736		3.87477	4.258	19.4191
	0.008368	37.7792	50		22.7065	13.7569	17.9309
	2.86972	45.6799	10.4804		1.63969	4.65687	3.30803
	5.54817	8.36993	13.0614		20.5839	10.161	21.6429
	5.49335	6.00236	0.005345		14.2791	0.006038	16.5868
	1.41895	11.6032	9.23458		7.39573	7.20801	13.1489
	5.07702	19.3148	12.486		6.02257	1.47393	11.7834
	20.3005	18.4835	19.463		12.2454	26.5162	48.5536
	20.9458	9.95513	0		19.4061	15.1205	14.3978
	3.93142	12.1572	32.9944		10.5869	12.344	13.0492
					15.6274	23.0785	5.85275
	Day-7	Day7	Day28		Day-7	Day7	Day28
	6.76766	10.7735	14.3685		16.6959	0	20.8713
	34.0905	9.77836	7.73957		9.36774	13.6529	1.77368
	8.82918	0.020468	29.9731		4.87948	18.1591	37.4081
	3.63408	3.35131	4.64272		0.090488	17.962	5.82527
	21.7686	40.158	43.4792
D
		Tfh1												Tfh17												Tfh2
	Day7	26.6422	36.8131	18.1987	11.8926	12.1209	13.3398	25.8152	19.0384	9.17111	19.0671			30.7303	0	24.3115	54.0445	52.0242	45.3933	28.2691	31.9081	26.328	49.0019			37.2991	26.3738	50.8774	24.2005	25.5282	24.4443	32.3825	35.6857	52.2396	16.0419
	Day28	13.744	25.2952	3.67623	8.14556	14.0728	12.0922	15.2245	21.3591	5.45218	7.61013			38.6668	25.2952	64.4937	69.9599	47.1768	59.2712	41.6541	35.7773	68.5159	68.115			36.2799	36.7621	18.8807	17.4884	26.6725	19.6073	22.8063	42.0255	14.0281	17.1398
E
	Day7	Day28		Day7	Day28		Day7	Day28
	41	40.5		21.6	19.1		24.2	32.2
	18.4	30.8		22.3	14.6		55.1	49.6
	43.9	49.9		6.37	10.4		47.1	36.9
	40.3	51.2		23.4	9.05		31.2	37.1
	39.9	36.7		20.1	26.8		30.9	21.9
	23.4	23.1		36.2	31.9		30	38.4
	37.1	30.8		23.5	26.7		30.2	36
	28.8	24.3		30	33.8		30.1	30.8
	35.6	29.6		19.6	26.4		39.2	36.9
	41	31.2		20.3	16.7		32.1	48.9
	21	17.5		41.3	39		32.7	39.9
	29.6	26		31.4	36		21.8	24.7
