# Supplementary material for: T follicular helper 17 (Tfh17) cells are superior for immunological memory maintenance
Source: eLife. 2023 Jan 19;12:e82217. doi: 10.7554/eLife.82217 (PMC9891720; doi:10.7554/eLife.82217)
Supplement: Figure 5—source data 1. [file elife-82217-fig5-data1.xlsx]

## Sheet: Figure5
D
	Tfh1	Tfh17	Tfh2
	0	60.7042	19.9717
	10.8473	53.5382	17.0624
	27.512	36.244	36.244
	0	33.3333	33.3333
	23.4484	20.9361	24.351
	49.8392	0.321543	49.8392
	57.1118	28.3927	14.4955
	5.33275	60.7316	22.4769
	17.2772	52.4876	21.5966
	32.8035	50.5344	5.755
	18.9131	30.5642	44.2104
	7.40832	74.7006	10.3223
	8.80737	57.2553	15.5651
	17.1931	55.605	18.5721
	14.6848	48.1696	20.7129
	25.3461	54.4408	10.1104
	0	100	0
	8.2785	35.1339	30.5891
	9.91259	46.9496	27.2176
	16.8388	32.8038	30.3813
	11.7276	52.5914	23.7874
	34.8636	54.4245	8.84897
	7.93063	50.6625	24.659
	19.11	57.1204	15.7592
	10.8562	49.6786	32.4518
	11.2871	73.1023	4.9835
	21.5393	42.3037	26.1364
	6.23032	59.9934	21.2977
	34.2391	33.4448	13.7124
	0	12.8287	25.7216
	10.9201	52.4164	32.7602
	18.2978	49.1103	29.3001
	15.5335	49.1501	19.7828
	0	61.3479	7.73043
	24.2866	66.7881	0.85003
	0	58.1452	20.9274
	3.47899	68.6056	17.4506
E
	Day-7	Day7	Day28		Day-7	Day7	Day28		Day-7	Day7	Day28		Day-7	Day7	Day28		Day-7	Day7	Day28
	18.6756	578.538	797.671		17.0004	12.9737	581.572		16.9602	13.7479	117.639		16.1602	13.1554	17.0158		18.6756	578.538	797.671
	54.3188	415.18	1544.19		15.8527	18.7656	1559.35		15.9537	12.644	148.334		15.7267	11.9435	20.4125		54.3188	415.18	1544.19
	26.3632	1359.54	1411.03		16.8727	12.8705	1115.82		16.4129	13.3102	153.867		16.9377	12.0492	12.1407		26.3632	1359.54	1411.03
	17.6715	135.73	1111.68		17.2917	23.3128	919.702		17.1619	12.6509	79.1872		16.613	11.9797	11.8094		17.6715	135.73	1111.68
	17.3404	722.593	934.894		15.7966	12.0276	888.953		17.0759	13.8371	75.9518		17.256	14.7418	21.6633		17.3404	722.593	934.894
	16.4444	871.263	1331.39		35.9399	38.2052	894.847		16.6326	15.4589	72.4785		18.7586	18.3799	20.6284		16.4444	871.263	1331.39
	15.6571	936.053	1446.63		24.482	30.7195	1207.57										15.6571	936.053	1446.63
	18.1988	203.563	1177.04		21.6433	16.465	1187.95										18.1988	203.563	1177.04
	55.3888	469.299	720.606		31.8338	23.9306	1329.01										55.3888	469.299	720.606
	19.2074	1483.75	1594.3		18.5162	14.2568	437.358										19.2074	1483.75	1594.3
	24.0303	152.706	1659.02		27.6072	28.9776	984.428										24.0303	152.706	1659.02
					19.476	16.3926	1022.27										17.0004	12.9737	581.572
					18.3203	15.7121	665.486										15.8527	18.7656	1559.35
					16.4201	13.1862	993.961										16.8727	12.8705	1115.82
					17.7133	14.4484	1168.33										17.2917	23.3128	919.702
																	15.7966	12.0276	888.953
																	35.9399	38.2052	894.847
																	24.482	30.7195	1207.57
																	21.6433	16.465	1187.95
																	31.8338	23.9306	1329.01
																	18.5162	14.2568	437.358
																	27.6072	28.9776	984.428
																	19.476	16.3926	1022.27
																	18.3203	15.7121	665.486
																	16.4201	13.1862	993.961
																	17.7133	14.4484	1168.33
																	16.1602	13.1554	17.0158
																	15.7267	11.9435	20.4125
																	16.9377	12.0492	12.1407
																	16.613	11.9797	11.8094
																	17.256	14.7418	21.6633
																	18.7586	18.3799	20.6284
																	16.9602	13.7479	117.639
																	15.9537	12.644	148.334
																	16.4129	13.3102	153.867
																	17.1619	12.6509	79.1872
																	17.0759	13.8371	75.9518
																	16.6326	15.4589	72.4785
G
	Day7	Day28		Day7	Day28		Day7	Day28			Day7	Day28		Day7	Day28		Day7	Day28
	26.6422	13.744		30.7303	38.6668		37.2991	36.2799			21.829	32.6098		33.0598	27.7033		24.9804	35.8898
	36.8131	25.2952		0	25.2952		26.3738	36.7621			4.41735	14.1565		88.846	64.0324		0.761661	9.32131
	18.1987	3.67623		24.3115	64.4937		50.8774	18.8807			15.5961	18.4255		46.7492	39.7657		19.3485	32.1906
	11.8926	8.14556		54.0445	69.9599		24.2005	17.4884			12.1359	8.25183		44.4055	49.6765		28.6604	22.9545
	12.1209	14.0728		52.0242	47.1768		25.5282	26.6725			25.9484	10.5027		29.4675	34.7063		44.584	46.8127
	13.3398	12.0922		45.3933	59.2712		24.4443	19.6073			20.7393	11.9534		32.5694	39.5222		36.0358	33.9626
	25.8152	15.2245		28.2691	41.6541		32.3825	22.8063			21.9202	10.7445		27.0153	37.2595		37.3753	21.4748
	19.0384	21.3591		31.9081	35.7773		35.6857	42.0255			8.08841	14.6846		51.5167	34.8345		27.775	43.8424
	9.17111	5.45218		26.328	68.5159		52.2396	14.0281			18.3104	16.2295		44.0343	36.8707		29.3359	34.2419
	19.0671	7.61013		49.0019	68.115		16.0419	17.1398			20.9461	11.5553		36.9514	37.8976		22.756	37.9041
											19.0087	8.41579		41.533	57.7657		27.8211	23.1547
	Day7	Day28		Day7	Day28		Day7	Day28			Day7	Day28		Day7	Day28		Day7	Day28
	7.28538	13.3836		64.0685	55.8597		12.2393	15.3939			14.4429	17.1545		47.0135	31.9573		27.7005	37.0401
	17.9195	21.0234		46.8371	35.3739		24.8317	32.1769			15.8161	18.327		37.8391	37.6442		40.2291	39.6483
	8.19682	20.1096		40.13	37.7152		36.1037	24.8551			15.0102	18.9721		40.9774	44.3885		33.2281	26.6319
	21.3257	14.9802		45.6146	42.4456		13.3313	11.811			6.81296	16.4213		48.7579	63.2647		4.9362	13.8491
	22.8248	13.0636		30.7129	37.0718		29.7315	30.96
