# Supplementary material for: T follicular helper 17 (Tfh17) cells are superior for immunological memory maintenance
Source: eLife. 2023 Jan 19;12:e82217. doi: 10.7554/eLife.82217 (PMC9891720; doi:10.7554/eLife.82217)
Supplement: Figure 6—figure supplement 1—source data 1. [file elife-82217-fig6-figsupp1-data1.xlsx]

## Sheet: Figure 6-figure supplement 1
B
	Effector phase	Memory phase		Effector phase	Memory phase
	0.073402	0.18249		0.133744	0.076095
	0.024214	0.143632		0.019105	0.124534
	0.054616	0.057161		0.065593	-0.02382
	-0.03866	0.125716		0.064631	-0.07322
	-0.02875	0.072927		0.026493	0.091051
	0.134533	-0.00512		0.224798	-0.02319
	0.137575	0.186258		-0.02588	0.167173
	0.126847	0.268591		0.150632	0.085594
	0.051098	0.110123		0.127584	-0.0674
	-0.00351	0.139433		0.063275	-0.05893
	-0.0036	0.077279		-0.00984	0.042922
	0.036995	0.052151		-0.00483	-0.05783
	-0.01124	0.091523		0.07258	-0.04639
	-0.022	0.055961		0.044245	-0.03858
	0.066216	0.094037		0.014208	0.045735
	0.082267	0.018085		0.035811	0.030067
	0.089226	0.065193		0.021152	0.010966
		0.04821			0.035642
	Effector phase	Memory phase		Effector phase	Memory phase
	0.004029	0.007854		0.00549	0.119902
	-0.05724	-0.08448		-0.00573	0.009219
	-0.05523	0.045451		0.053103	0.152921
	-0.00207	0.009992		0.151011	-0.07534
	-0.01555	-0.04544		0.10971	0.103064
	0.064871	0.050578		0.065601	0.10761
	0.080718	0.072335		0.051852	0.151484
	-0.0142	0.036302		-0.10839	0.148509
	-0.06928	-0.04312		0.157052	-0.09696
	-0.04572	0.056199		0.089876	-0.04582
	0.006289	-0.01848		0.137959	0.050752
	0.001267	-0.02404		0.21847	0.090991
	-0.05532	-0.00737		-0.01394	0.142677
	-0.02472	0.015574		0.050779	-0.0466
	-0.02171	0.003039		0.0237	-0.00721
	0.003129	-0.0361		0.076797	-0.11227
	-0.03786	0.013612		-0.01952	-0.12459
	0.065821	-0.0381		-0.03953	-0.07336
	0.006519	0.011278		0.192715	0.01919
	0.019192	-0.00452		0.083055	-0.01523
	-0.03258	-0.00598		0.049187	-0.0221
	-0.01157	0.06356		0.022379	0.154224
	-0.07201	0.084496		-0.01288	0.03996
	-0.03263	0.020203		0.010389	-0.03907
	-0.04283	-0.00047		-0.02193	-0.03486
	-0.01351	0.02109		-0.01811	-0.03464
	0.032645	-0.03355		0.126929	0.059334
	-0.05086	0.006363		0.083537	-0.0333
	0.034632	-0.02337		0.126572	0.101343
	0.031106	-0.05881		0.174242	0.075192
	-0.02177	-0.0083		0.076305	0.031001
		-0.02603			0.026485
		-0.02337			0.101343
		-0.05881			0.075192
		-0.0083			0.031001
		-0.02603			0.026485
	Effector phase	Memory phase		Effector phase	Memory phase
	-0.01207	-0.02032		-0.03269	0.012928
	0.031371	-0.01349		0.059763	-0.03524
	0.058395	0.107069		0.061366	0.031056
	-0.08158	-0.00078		-0.07751	-0.0751
	0.115558	-0.05167		0.216512	-0.05602
	-0.04679	0.019324		0.014919	0.031666
	-0.07228	0.034286		-0.06153	0.060989
	0.018467	0.10192		-0.00929	0.085863
	0.029684	0.130219		-0.00588	0.031396
	-0.00746	0.072164		-0.07616	0.159395
	0.038262	0.015467		0.025411	0.033149
	0.016464	0.044127		0.031476	0.101867
	0.008143	0.030007		-0.00276	0.069945
	0.051157	0.007435		0.044427	0.021217
	-0.0003	-0.01933		0.056493	0.045964
	0.035637	0.056377		0.005386	0.003651
	0.097681	-0.06128		0.080458	-0.09067
	0.041917	-0.01516		-0.02255	-0.01946
	-0.06874	-0.00303		0.053886	0.109349
	-0.05435	-0.00768		0.045038	-0.028
	0.005369	-0.0173		0.118845	0.062028
	-0.0292	0.107009		-0.03299	0.105906
	-0.05421	0.049239		-0.04329	-0.05337
	-0.0212	0.053312		-0.01395	0.03793
	-0.0599	0.086171		0.063371	0.012668
	-0.04893	0.148483		0.023068	0.030599
	-0.06621	0.080828		-0.09376	0.017259
	-0.05109	0.081446		0.035215	0.129498
	-0.02934	0.038037		0.047869	-0.04922
	-0.09929	-0.02118		-0.05207	0.037181
	-0.05238	0.112586		0.121336	-0.05098
	-0.0326	0.085874		0.040286	-0.05486
	-0.0479	0.089347		0.03185	-0.03202
	-0.02525	0.113681		0.095826	-0.00824
	-0.00746	-0.0288		0.079763	0.032791
	0.076021	-0.0139		0.133978	0.062839
	-0.03337	0.03773		-0.00917	0.098218
	-0.01994	0.005935		0.057831	-0.10579
	-0.01814	-0.07725		-0.05958	0.085411
	-0.04963	0.093895		0.051892	-0.02625
		0.003662			0.075146
		-0.05425			0.106201
		-0.02427			0.092212
		0.124885			-0.00476
		0.129339			0.061961
		0.018994			-0.03616
		0.159737			-0.02132
		-0.02736			0.139108
		0.080451			-0.01888
		-0.01989			-0.00915
		0.061531			0.178253
		-0.04709			0.11381
		0.134515			0.090078
		0.091319			-0.02931
		-0.02421			0.035577
		-0.01675			0.121695
		0.032759			-0.09167
		0.069843			0.018473
		-0.05179			-0.07585
		0.103093			-0.06132
		-0.02447			0.065972
		0.025287			0.071882
		-0.01936			-0.02608
		0.060906			0.020995
		0.023472			0.083023
		-0.04342			0.086988
		-0.03371			0.095574
		-0.0145			0.191325
		0.030286			0.086773
		-0.03089			-0.03423
		-0.01356			-0.02517
		0.019259			-0.01634
		-0.00267			-0.0885
		0.053514			-0.01927
		-0.03826			-0.05131
		0.044331			0.006021
		0.022054			-0.10328
		-0.0485			0.017384
		0.005337			-0.0426
		-0.03544			-0.02951
		0.01549			-0.04331
		-0.00571			0.028147
		-0.00196			0.151344
		-0.02291			-0.05263
		-0.04235			-0.01918
		-0.04176			-0.0008
		0.023403			0.031472
		0.018846			-0.00083
		-0.08405			-0.08293
		-0.00122			0.003265
		0.003737			-0.01359
		-0.06496			-0.01232
		-0.05263			-0.05301
		-0.06298			0.128165
		-0.01256			-0.02144
		-0.02764			-0.04571
		-0.02285			0.13511
		0.000134			-0.01986
		0.026832			-0.02894
		-0.02582			0.024481
		-0.0618			-0.01037
