# Supplementary material for: T follicular helper 17 (Tfh17) cells are superior for immunological memory maintenance
Source: eLife. 2023 Jan 19;12:e82217. doi: 10.7554/eLife.82217 (PMC9891720; doi:10.7554/eLife.82217)
Supplement: Figure 6—source data 1. [file elife-82217-fig6-data1.xlsx]

## Sheet: Figure6
C
	Effector phase	Memory phase
	-0.03269	-0.02032
	0.059763	-0.01349
	0.061366	0.107069
	-0.07751	-0.00078
	0.216512	-0.05167
	0.014919	0.019324
	-0.06153	0.034286
	-0.00929	0.10192
	-0.00588	0.130219
	-0.07616	0.072164
	0.025411	0.015467
	0.031476	0.044127
	-0.00276	0.030007
	0.044427	0.007435
	0.013432	-0.01933
	0.056493	0.056377
	0.005386	-0.06128
	0.080458	-0.01516
	-0.02255	-0.00303
	0.053886	-0.00768
	0.045038	-0.0173
	0.118845	0.107009
	0.048223	0.049239
	0.133744	0.053312
	0.019105	0.086171
	0.065593	0.148483
	0.064631	0.080828
	0.026493	0.081446
	0.224798	0.038037
	-0.02588	-0.02118
	0.150632	0.112586
	0.127584	0.085874
	0.063275	0.089347
	-0.00984	0.113681
	0.076376	-0.0288
	0.00549	-0.0139
	-0.00573	0.03773
	0.053103	0.005935
	0.151011	-0.07725
	0.10971	0.093895
	0.065601	0.003662
	0.051852	-0.05425
	-0.10839	-0.02427
	0.157052	0.124885
	0.089876	0.03411
	0.137959	0.129339
	0.21847	0.018994
	-0.01394	0.159737
	0.050779	-0.02736
	0.0237	0.080451
	0.076797	-0.01989
	-0.01952	0.061531
	0.061401	-0.04709
	-0.03299	0.134515
	-0.04329	0.091319
	-0.01395	-0.02421
	-0.03008	-0.01675
	-0.03953	0.032759
	0.192715	0.069843
	0.083055	-0.05179
	0.049187	0.103093
	0.022379	-0.02447
	-0.01288	0.025287
	0.010389	-0.01936
	-0.02193	0.060906
	-0.01811	0.023472
	0.029475	-0.04342
	0.126929	-0.03371
	0.126929	-0.0145
	-0.00483	0.030286
	0.07258	-0.03089
	0.044245	-0.01356
	0.014208	0.019259
	0.035811	-0.00267
	0.021152	0.053514
	0.030527	0.024155
	0.063371	0.18249
	0.023068	0.143632
	-0.09376	0.057161
	0.035215	0.125716
	0.047869	0.072927
	-0.05207	-0.00512
	0.003949	0.186258
	0.121336	0.268591
	0.040286	-0.00299
	0.03185	0.110123
	0.095826	0.139433
	0.079763	0.077279
	0.133978	0.052151
	0.08384	0.091523
	-0.00917	0.055961
	0.057831	0.103676
	-0.05958	0.119902
	0.051892	0.009219
	0.010245	0.152921
	0.083537	-0.07534
	0.126572	0.103064
	0.174242	0.10761
	0.076305	0.151484
	0.115164	0.148509
		0.089672
		-0.03423
		-0.02517
		-0.01634
		-0.0885
		-0.01927
		-0.05131
		0.006021
		-0.10328
		0.017384
		-0.0426
		-0.02951
		-0.04331
		0.028147
		0.151344
		-0.05263
		-0.02022
		-0.09696
		-0.04582
		0.050752
		0.090991
		0.142677
		0.028328
		-0.0466
		-0.00721
		-0.11227
		-0.12459
		-0.07336
		0.01919
		-0.01523
		-0.0221
		0.154224
		0.03996
		-0.03907
		-0.03486
		-0.03464
		-0.02281
		-0.05783
		-0.04639
		-0.03858
		0.045735
		0.030067
		0.010966
		0.035642
		-0.00291
		-0.01918
		-0.0008
		0.031472
		-0.00083
		-0.08293
		0.003265
		-0.0115
		-0.01359
		-0.01232
		-0.05301
		0.128165
		-0.02144
		0.004623
		-0.04571
		0.13511
		-0.01986
		-0.02894
		0.024481
		-0.01037
		0.009119
		0.059334
		-0.0333
		0.101343
		0.075192
		0.031001
		0.026485
		0.101343
		0.075192
		0.031001
		0.026485
		0.049408
D
	Effector phase	Memory phase
	-0.01207	-0.02032
	0.031371	-0.01349
	0.058395	0.107069
	-0.08158	-0.00078
	0.115558	-0.05167
	-0.04679	0.019324
	-0.07228	0.034286
	0.018467	0.10192
	0.029684	0.130219
	-0.00746	0.072164
	0.038262	0.015467
	0.016464	0.044127
	0.008143	0.030007
	0.051157	0.007435
	-0.0003	-0.01933
	0.035637	0.056377
	0.097681	-0.06128
	0.041917	-0.01516
	-0.06874	-0.00303
	-0.05435	-0.00768
	0.005369	-0.0173
	0.073402	0.107009
	0.024214	0.049239
	0.054616	0.053312
	-0.03866	0.086171
	-0.02875	0.148483
	0.134533	0.080828
	0.137575	0.081446
	0.126847	0.038037
	0.051098	-0.02118
	-0.00351	0.112586
	-0.0036	0.085874
	0.004029	0.089347
	-0.05724	0.113681
	-0.05523	-0.0288
	-0.00207	-0.0139
	-0.01555	0.03773
	0.064871	0.005935
	0.080718	-0.07725
	-0.0142	0.093895
	-0.06928	0.003662
	-0.04572	-0.05425
	0.006289	-0.02427
	0.001267	0.124885
	-0.05532	0.129339
	-0.02472	0.018994
	-0.02171	0.159737
	0.003129	-0.02736
	-0.03786	0.080451
	-0.0292	-0.01989
	-0.05421	0.061531
	-0.0212	-0.04709
	0.065821	0.134515
	0.006519	0.091319
	0.019192	-0.02421
	-0.03258	-0.01675
	-0.01157	0.032759
	-0.07201	0.069843
	-0.03263	-0.05179
	-0.04283	0.103093
	-0.01351	-0.02447
	0.032645	0.025287
	0.036995	-0.01936
	-0.01124	0.060906
	-0.022	0.023472
	0.066216	-0.04342
	0.082267	-0.03371
	0.089226	-0.0145
	-0.0599	0.030286
	-0.04893	-0.03089
	-0.06621	-0.01356
	-0.05109	0.019259
	-0.02934	-0.00267
	-0.09929	0.053514
	-0.05238	0.18249
	-0.0326	0.143632
	-0.0479	0.057161
	-0.02525	0.125716
	-0.00746	0.072927
	0.076021	-0.00512
	-0.03337	0.186258
	-0.01994	0.268591
	-0.01814	-0.00299
	-0.04963	0.110123
	-0.05086	0.139433
	0.034632	0.077279
	0.031106	0.052151
	-0.02177	0.091523
		0.055961
		0.007854
		-0.08448
		0.045451
		0.009992
		-0.04544
		0.050578
		0.072335
		0.036302
		-0.03826
		0.044331
		0.022054
		-0.0485
		0.005337
		-0.03544
		0.01549
		-0.00571
		-0.00196
		-0.02291
		-0.04235
		-0.04176
		0.023403
		0.018846
		-0.08405
		-0.04312
		0.056199
		-0.01848
		-0.02404
		-0.00737
		0.015574
		0.003039
		-0.0361
		0.013612
		-0.0381
		0.011278
		-0.00452
		-0.00598
		0.06356
		0.084496
		0.020203
		-0.00047
		0.02109
		0.094037
		0.018085
		0.065193
		0.04821
		0.222495
		0.088366
		0.052279
		-0.00122
		0.003737
		-0.06496
		-0.05263
		-0.06298
		-0.01256
		-0.02764
		-0.02285
		0.000134
		0.026832
		-0.02582
		-0.0618
		-0.04282
		-0.00744
		0.026695
		-0.0402
		-0.03124
		0.023103
		-0.03355
		0.006363
		-0.02337
		-0.05881
		-0.0083
		-0.02603
E
	Effector phase	Memory phase
	0.013432	0.021367
	0.048223	0.044477
	0.076376	0.038351
	0.061401	0.089672
	-0.03008	-0.02022
	0.029475	0.028328
	0.126929	-0.02281
	0.030527	-0.00291
	0.003949	-0.0115
	0.08384	0.004623
	0.010245	0.009119
	0.115164	0.049408
F
	Effector phase	Memory phase
	0.010523	0.03411
	0.008173	0.024155
	0.047978	0.103676
	-0.01403	0.011574
	-0.03487	-0.01277
	-0.01262	-0.00736
	0.032645	0.01136
	0.040245	0.084095
	-0.05913	-0.03177
	-0.01493	-0.01852
	-0.03027	-0.01198
	-0.00172	-0.02602
