# Supplementary material for: T follicular helper 17 (Tfh17) cells are superior for immunological memory maintenance
Source: eLife. 2023 Jan 19;12:e82217. doi: 10.7554/eLife.82217 (PMC9891720; doi:10.7554/eLife.82217)
Supplement: Figure 7—figure supplement 1—source data 1. [file elife-82217-fig7-figsupp1-data1.xlsx]

## Sheet: Figure 7-figure supplement 1
A
	Control	Covid-19
	0.72	144.1
	0.42	31.1
	1.1	118.2
	0.47	52.6
	0.34	25.4
	0.54	83.7
	0.22	102.2
	0.43	129.7
	0.3	81.1
	0.24	97
	0.44	33
	0.27	78.5
	1.59	11.7
C
	Tfh1	Tfh17	Tfh2
	7.7	76.9	13.5
	27.2	45.7	1.1
	15.4	73.1	0
	25	50	12.5
	28.6	42.9	7.1
	1.4	75	4.2
	0	60	20
	19.9	39.1	17.7
	8.8	47.1	8.8
	3.6	58.2	1.8
	7.5	71.6	3
	9.4	68.8	3.1
