# Supplementary material for: T follicular helper 17 (Tfh17) cells are superior for immunological memory maintenance
Source: eLife. 2023 Jan 19;12:e82217. doi: 10.7554/eLife.82217 (PMC9891720; doi:10.7554/eLife.82217)
Supplement: Figure 7—source data 1. [file elife-82217-fig7-data1.xlsx]

## Sheet: Figure7
C
	Tfh1	Tfh17	Tfh2		Tfh1	Tfh17	Tfh2
	23.2143	32.1429	44.6429		26.087	0	0
	9.79298	68.6206	1.81438		0	14.5815	6.67833
	10.293	43.9967	24.5919		15.3351	46.8144	20.4624
	16.6696	42.1127	30.6896		19.084	50.0132	28.2706
	8.10906	73.796	18.0949		0.322203	70.2988	29.379
	16.6667	62.037	21.2963		0.956938	63.4769	27.9107
	15.6919	52.9244	15.6919		0	54.0979	14.5253
	16.5894	25.0232	16.6821		8.15639	56.4543	18.5372
	3.98805	79.6504	0		42.5811	42.9086	14.5103
	3.3086	68.0925	21.8245		11.1303	50.9059	18.9819
	13.0942	40.3587	26.9058		9.15658	47.8177	0
	3.04054	69.3182	10.7494		0	22.5327	43.9387
	5.65049	59.7547	34.5948		13.0177	47.666	26.2985
					7.14523	64.1328	21.5768
					15.3226	44.3548	40.3226
E
	Age	%		Age	%		Age	%
	2	20.7		2	37.9		2	16.8
	6	27.1		6	31		6	20.9
	5	35.2		5	21.6		5	26.7
	6	30.6		6	25.8		6	28.5
	2	37.6		2	21.9		2	28.1
	5	31.2		5	27.6		5	22.5
	1	25.6		1	30.3		1	34.5
	3	46.7		3	17.7		3	23.1
	5	26.7		5	35.8		5	22.6
	1	33.8		1	18.2		1	25
	1	23.8		1	31.2		1	29.6
	5	33.1		5	27.4		5	23.3
	6	28.1		6	32.2		6	23.4
	9	36		9	17.9		9	38.4
	9	33.8		9	29.6		9	20.5
	7	42.5		7	20.7		7	21.4
	1	39.3		1	20.4		1	26.8
	12	23.6		12	35.3		12	25
	18	34.6		18	31.5		18	22.7
	18	23.3		18	41		18	15.5
	18	46.4		18	16.9		18	26.2
	18	34.4		18	21.9		18	33.1
	19	58.8		19	11.5		19	25.2
	19	27.5		19	24.6		19	36.8
	19	42.9		19	20.8		19	29.4
	19	40.8		19	17.7		19	33.8
	19	34.1		19	25.3		19	28.8
	19	26.9		19	36.4		19	20.5
	19	41.6		19	24.3		19	20.3
	20	43.2		20	14.9		20	31.4
	20	24.8		20	37		20	27.2
	20	28.9		20	33.5		20	21.4
	20	29.7		20	32.2		20	22.5
	18	36.7		18	28.3		18	24.6
	18	37.9		18	26		18	26.5
	18	26.5		18	35.5		18	21.2
	18	19.7		18	25.3		18	51.4
	19	42.1		19	23.4		19	22.8
	19	29.7		19	25.6		19	35.3
	19	29.4		19	29.8		19	28.4
	19	31		19	24.9		19	33.7
	19	30		19	27.6		19	30.6
	19	33.1		19	22.7		19	37.9
	19	30.6		19	31.5		19	22.3
	20	29.4		20	29.7		20	30.7
	20	22.1		20	36.6		20	30.8
	20	36.3		20	26.2		20	27.2
	18	32.8		18	31.5		18	17.5
	18	27.6		18	38.2		18	23.8
	18	31.2		18	27.6		18	32.7
	18	25.6		18	32.6		18	28.4
	19	35.3		19	25		19	31.2
	19	18.2		19	45.4		19	25.5
	19	30.8		19	29.4		19	32.6
	19	30		19	30.7		19	27.6
	19	22.5		19	19.8		19	53.9
	19	21.2		19	42.1		19	25.4
	19	25.5		19	35.4		19	25.9
	20	20.5		20	42.1		20	17.2
	20	25.8		20	39.4		20	23.4
	38	13.8		38	45		38	8.86
	71	19.1		71	45.3		71	15.6
	27	14.3		27	51.6		27	15.6
	65	22.3		65	39.3		65	12.7
	33	12.5		33	53.9		33	13.2
	29	12.7		29	51.2		29	14
	21	29.4		21	32.3		21	13.2
	62	23.6		62	34.1		62	19
	29	16		29	50.6		29	13.7
	32	17.5		32	38.5		32	17.1
	24	36.2		24	23.9		24	23
	30	24.1		30	35.1		30	19.9
	33	21.6		33	34.8		33	13.2
	55	21.5		55	39.7		55	11.9
	54	11.1		54	52.2		54	11.2
	49	15.3		49	46.5		49	18.9
	30	12.2		30	57.1		30	9.79
	65	17		65	43.5		65	22.8
	60	24.2		60	41.3		60	13.8
	60	12.2		60	58		60	11.6
	64	10.8		64	54.1		64	8.2
	69	14.7		69	47.6		69	14.1
	34	12.6		34	51.4		34	5.11
	26	15.7		26	48.9		26	20.6
	25	21.7		25	41.7		25	17
	30	26.7		30	35.2		30	10.3
	51	19.3		51	44.9		51	16.5
	27	22.7		27	38.4		27	15.9
	53	20.9		53	36.6		53	16.2
	55	24.2		55	34.1		55	20.7
	35	10.5		35	53.2		35	11.4
	33	23.4		33	40		33	17.2
	42	14.3		42	51.6		42	13.9
	21	15.1		21	43.9		21	12.9
	26	23.1		26	36.8		26	18.8
	28	24.8		28	36.9		28	20.7
	30	23.3		30	36.5		30	23.7
	26	23.1		26	39		26	16
	27	15.7		27	50.8		27	15.7
	24	28.8		24	37.2		24	18.1
	25	22.2		25	41.1		25	21.5
	26	25.3		26	38.4		26	11.2
	28	11.6		28	56		28	23.7
	28	21.5		28	39.1		28	17.7
	23	18.8		23	43		23	27.6
	25	21.1		25	42.3		25	15.3
	28	22.5		28	40.4		28	20.6
	39	14.1		39	50.8		39	22.5
	30	28.4		30	27.4		30	29.1
	30	32		30	22.8		30	27.7
	30	34.3		30	26.5		30	25.1
	30	31.8		30	26.5		30	24.1
	24	21		24	41.6		24	25.6
