# Supplementary material for: T follicular helper 17 (Tfh17) cells are superior for immunological memory maintenance
Source: eLife. 2023 Jan 19;12:e82217. doi: 10.7554/eLife.82217 (PMC9891720; doi:10.7554/eLife.82217)
Supplement: Figure 8—figure supplement 1—source data 1. [file elife-82217-fig8-figsupp1-data1.xlsx]

## Sheet: Figure 8-figure supplement 1
A
		iTfh1						iTfh17						iTfh2
pdcd1	Day5	4.02293	5.30781	5.62829	5.25181	5.46938	ND	5.87937	5.80474	6.21814	5.12525	4.70211	4.49823	5.40067	5.0415	4.75945	4.86461	5.3082	6.34802
	Day40	4.14054	5.35253	4.45916	4.57597	5.1811	6.04661	5.07951	4.99361	4.85181	5.45409	5.72056	5.19006	5.39819	5.00452	4.81367	5.34774	5.73247	5.24023
		iTfh1						iTfh17						iTfh2
cxcr5	Day5	ND	3.54152	5.86001	6.81288	6.18478	6.15931	6.99106	6.86877	6.78422	5.974	5.33472	6.25664	6.81824	5.8992	5.83871	5.86796	6.44328	ND
	Day40	5.85273	6.11389	6.03359	5.41258	5.49679	5.93679	6.02461	5.95259	5.9964	5.5343	4.99702	4.41605	6.25974	5.82397	6.03425	5.55736	5.57159	5.68093
		iTfh1						iTfh17						iTfh2
cd40lg	Day5	ND	0.41397	0.695285	0.162033	0.613761	0.541576	1.58846	2.2264	1.65489	0.500026	1.2704	1.05072	1.20434	0.654937	1.09182	0.315709	0.565364	1.36047
	Day40	0.944167	0.746046	0.656843	0.113012	-0.77631	1.07189	0.467369	0.618292	-0.2103	0.453758	-0.58874	0.794074	0.831747	0.870817	1.04422	0.523263	-0.47464	0.423597
		iTfh1						iTfh17						iTfh2
icos	Day5	ND	1.92489	2.52315	3.44531	ND	3.79444	3.91389	4.17165	3.87931	3.67698	3.50122	3.55742	0.454567	2.30475	2.67729	3.52137	3.59533	4.57469
	Day40	3.50236	3.64894	2.60748	3.08534	3.31546	4.10862	2.99794	2.34708	2.02882	3.08995	2.98382	2.48628	2.95674	2.32488	2.73457	3.85027	3.33239	3.53619
		iTfh1						iTfh17						iTfh2
il21	Day5	ND	7.88084	8.2472	11.0432	9.58281	10.3632	8.75024	8.53848	8.35	10.6311	9.92916	10.627	9.26291	9.24769	8.87426	11.4449	11.104	11.6962
	Day40	7.76612	6.98503	7.94796	9.42451	8.98679	10.5945	8.40546	8.87161	8.38165	9.73497	9.76309	9.78671	8.2838	7.90571	7.70768	9.13809	9.359	9.73218
		iTfh1						iTfh17						iTfh2
bcl6	Day5	ND	0.526597	3.29867	3.54936	2.30846	2.99743	3.74317	3.72174	3.1652	2.69867	2.09433	2.1864	3.55937	3.25868	3.39062	2.89006	3.11204	3.52076
	Day40	2.28911	1.83432	1.86529	1.96848	1.76235	2.42884	2.67676	2.75848	2.65508	2.39688	1.63786	2.16515	3.02756	2.9922	3.28679	2.49556	2.29627	2.22032
B
		iTfh1								iTfh17								iTfh2
BGC	Day5	74602.5	36750	49214.3	339107	120323	212727			72635.1	62333.3	333.333	329143	977250	855000			47730.5	191379	91428.6	224189	451184	513333
	Day40	50256.4	57285.7	93461.5	17704.9	21774.2	26571.4			486818	144762	406154	51000	73965.5	61730.8	53513.5		77250	38800	69000	15288.5	32272.7	14558.8
		iTfh1								iTfh17								iTfh2
BASC	Day5	955753	884000	865214	1421786	273710	530454			883851	1093067	3261.91	787714	885000	1155000			744716	3590862	2348750	295540	672632	697500
	Day40	162436	149857	294615	121721	118064	216429			946818	310476	857115	152000	258621	173654	179189		127750	124800	170000	39519.2	84090.9	50294.1
C
	Ifng	Il4
	ND	0.798151
	2.42323	0.222358
	-0.13383	0.204809
	ND	0.22251
	ND	-0.50834
	0.336256	-0.06875
	-1.48183	0.576379
	-0.86368	0.51533
	-0.7638	0.528418
	-1.88615	0.536424
	ND	0.650717
	ND	0.64368
	-0.85053	0.204699
	-1.66039	0.350609
	-0.74833	0.227193
	-0.82616	-0.31013
	ND	-0.15319
	ND	ND
	1.32326	-0.89519
	0.876394	-0.18644
	ND	-0.41934
	0.502823	-0.02375
	1.12686	-0.00328
	1.74185	0.532454
	0.436263	0.707283
	0.252935	0.688141
	0.897537	0.669934
	0.612213	0.503455
	0.295849	0.503723
	0.840834	0.535798
	0.783363	-0.26429
	-0.34047	0.088977
	-0.16967	-0.19226
	0.375033	0.115852
	-0.15405	0.33492
	-0.53572	0.373593
D
		iTfh1								iTfh17								iTfh2
IgG2a	Day5	51.4	43.8	53.1	49.8	66.2	56.8			30.9	23.8	22.4	26.5	18.3	21			22.6	22.9	44.3	7.95	7.37	8.78
	Day40	60	57.6	73.6	22.8	23.5	38.2			44.1	38.7	30.7	21.3	16.8	18.3	26.9		53.6	61.4	39	12.9	11.4	14.3
		iTfh1								iTfh17								iTfh2
IgG3	Day5	5.46	4.98	7.1	10.4	10.6	9.21			3.69	3.33	0	3.99	2.12	5.03			3.09	3.15	3.52	6.17	2.86	3.28
	Day40	14.1	14.1	12.9	12.2	19.5	19.4			6.63	8.79	4.39	10.3	17	24.6	23.6		13.6	13.5	10.7	12	3.03	0
		iTfh1								iTfh17								iTfh2
IgG1	Day5	10.7	12.1	13.4	22.6	21.7	26.3			19	9.44	13.2	38.1	37.8	42.6			30.8	57.4	26.8	59.4	62.9	61.3
	Day40	8.31	12.9	12.7	5.29	14.8	11.2			8.29	26.6	18.2	18.8	20.7	15.4	35.1		31.3	20.4	21.6	44	38.5	40
		iTfh1								iTfh17								iTfh2
IgE	Day5	0	0.19	0.079	0.17	0.23	0.11			0.054	0.026	0	0	0.041	0			0.076	0.16	0.21	0.67	0.32	0.22
	Day40	0	0	0	0	0	0			0.19	0	0.053	0	0	0	0		0	0	0.25	0	0	0
		iTfh1								iTfh17								iTfh2
IgA	Day5	5.73	5.6	8.24	26.4	11.8	20.5			3.69	9.65	4.88	29.2	18.9	18			5.84	8.57	5.8	16.1	21.2	14.6
	Day40	16.4	17.7	20.9	11.2	7.06	11.9			24	20.5	25.4	4.55	5.76	4.09	4.94		11.3	15.7	18.1	10.7	9.96	7.69
