# Supplementary material for: T follicular helper 17 (Tfh17) cells are superior for immunological memory maintenance
Source: eLife. 2023 Jan 19;12:e82217. doi: 10.7554/eLife.82217 (PMC9891720; doi:10.7554/eLife.82217)
Supplement: Figure 8—source data 1. [file elife-82217-fig8-data1.xlsx]

## Sheet: Figure8
C
		Tfh1						Tfh17						Tfh2									iTfh1						iTfh17						iTfh2
	Day1	63521.1	66682	78611.1	3732.39	5375	7928.57	57432.4	35945.9	51621.6	25810.8	15797.1	16158.5	47266.7	56646	74621.9	7171.05	9133.33	5614.03			Day1	91.2597	95.801	112.939	65.7267	94.6527	139.621	118.826	74.3709	106.803	134.044	82.0395	83.9166	79.4244	95.1849	125.391	98.151	125.009	76.84
	Day35	28518.5	30000	19137.9	948.276	714.286	7200	40681.8	52285.7	47692.3	9444.44	13200	14196.4	1218333*	39482.8	7391.3	6320.76	6326.53	7875			Day35	40.9721	43.1005	27.4951	16.6989	12.5784	108.177	84.1693	49.0481	98.6737	126.791	68.5519	73.7267	2047.224*	66.3448	12.42	86.5129	86.592	107.786
E
		Tfh1							Tfh17							Tfh2
	Day5	417903	1099286	929667	564103	653973	851755		460250	354662	137708	818769	832663	947643		951094	108529	429554	797042	256357	699556
	Day40	385476	389204	238942	275905	414848	257250	9230.77	624844	546413	1005417	330600	532027	443712	732121	674196	455729	558036	480086	715086	321912	11339.3
G
		iTfh1							iTfh17							iTfh2
	Day5	8.39	14.5	10.7	4.82	18.5	6.44		26.7	16	9.87	11.8	6.74	8.24		11.4	11.9	16.8	8.64	7.42	8.79
	Day40	5.77	6.4	7.9	9.86	6.1	4.89	1.18	10.9	7.2	11.9	7.52	7.85	12.4	13	4.63	6.86	6.52	4.3	6.04	5.25	2.08
